# Supplementary material for: Rational design of a lysosome-targeted fluorescent probe for monitoring the generation of hydroxyl radicals in ferroptosis pathways
Source: Royal Society of Chemistry journal article supplement (doi:10.1039/d4ra00562g), 2024-01-01
Supplement: d4ra00562g1.pdf [file d4ra00562g1.pdf]

**Rational design of a lysosome-targeted fluorescence probes for monitoring the generation of hydroxyl radicals in ferroptosis pathways**

Lili Zhong,<sup>a,1</sup> Datian Fu,<sup>b,1</sup> Jin Xu,<sup>c</sup> Linyan Tan,<sup>d</sup> Haimei Wu,<sup>e\*</sup>

<sup>a</sup> Department of Pharmacy, Hainan General Hospital (Hainan Affiliated Hospital of Hainan Medical University), Haikou, Hainan, 570311, China.

<sup>b</sup> Department of Pharmacy, Hainan women and children's medical center, Haikou, Hainan, 570312, China.

<sup>c</sup> Pharmaceutical and bioengineering school, Hunan Chemical Vocational Technology College, Zhuzhou, 412006, China.

<sup>d</sup> Department of Pharmacy, Tropical Agricultural Technology College, Hainan Vocational University, Haikou, Hainan, 570216, China

<sup>e</sup> Department of Clinical Pharmacy, Hainan Cancer Hospital, Haikou, Hainan, 570100, China.

\* Corresponding authors:

Haimei Wu, E-mail: wu634202863@126.com

<sup>1</sup> These authors contribute equally to this work.

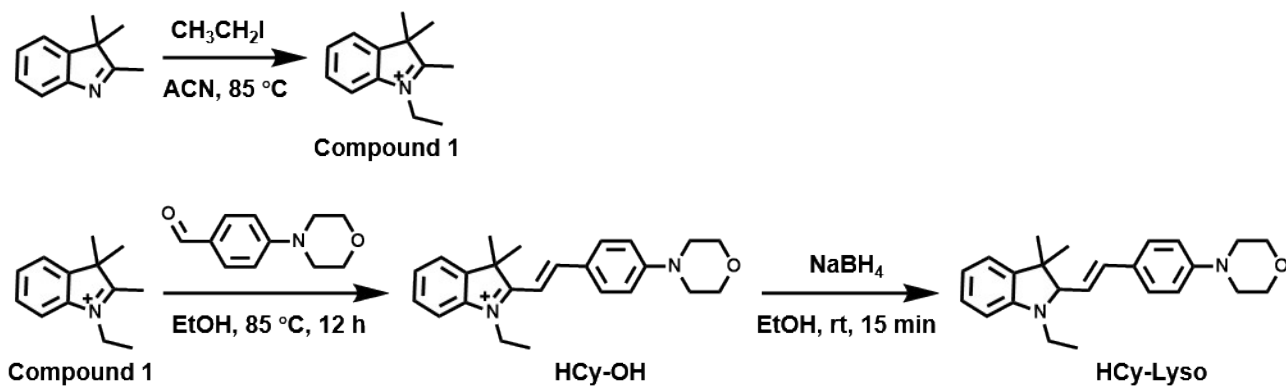

**Scheme S1.** The synthesis route of HCy-Lyso.

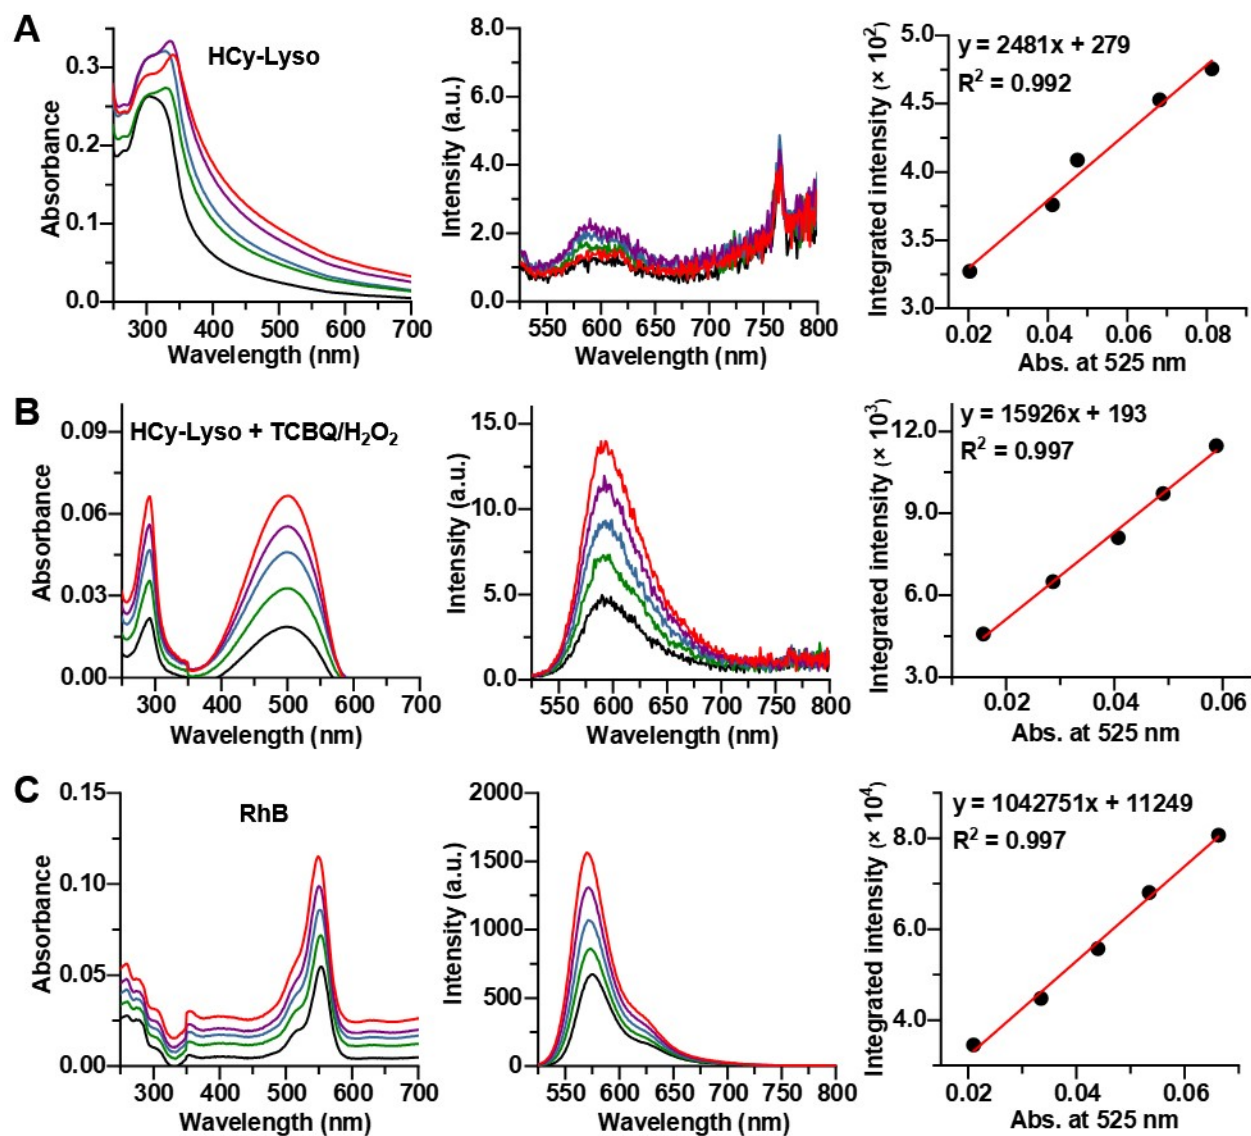

**Fig. S1** Calculation the fluorescence quantum yield of HCy-Lyso, HCy-Lyso treating with TCBQ/H<sub>2</sub>O<sub>2</sub> and RhB in pH 4.0 PBS solution and EtOH, respectively. Absorption spectra, fluorescence emission spectra, and plot of integrated fluorescence intensity (525-800 nm) versus absorbance at 510 nm of (a) HCy-Lyso, (b) HCy-Lyso treating with TCBQ/H<sub>2</sub>O<sub>2</sub>, and (c) RhB at various concentrations.

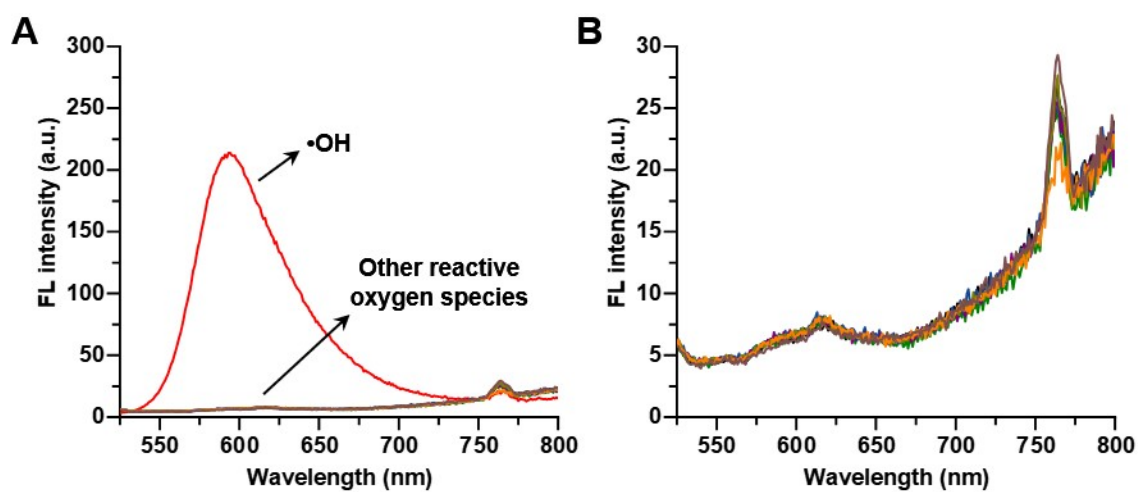

**Fig. S2** (A) The fluorescence spectra of 10  $\mu\text{M}$  HCy-Lyso toward various ROS in pH 4.0 phosphate buffer: control group;  $\bullet\text{OH}$ , 10  $\mu\text{M}$  TCBQ + 10  $\mu\text{M}$  H<sub>2</sub>O<sub>2</sub>; 100  $\mu\text{M}$  OCl<sup>-</sup>; <sup>1</sup>O<sub>2</sub> (100  $\mu\text{M}$  H<sub>2</sub>O<sub>2</sub> + 500  $\mu\text{M}$  OCl<sup>-</sup>); 100  $\mu\text{M}$  NO; 100  $\mu\text{M}$  H<sub>2</sub>O<sub>2</sub>; 100  $\mu\text{M}$  ONOO<sup>-</sup>; 100  $\mu\text{M}$  TBHP. (B) The corresponding other ROS from (A).  $\lambda_{\text{ex/em}} = 510/592$  nm.

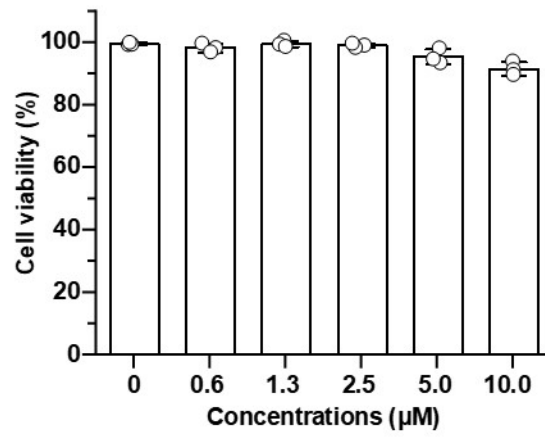

**Fig. S3** Relative viability of 4T1 cells treated with various concentrations of HCy-Lyso (0-10  $\mu\text{M}$ ) for 12 h. Data are presented as the mean  $\pm$  SD (n = 3).

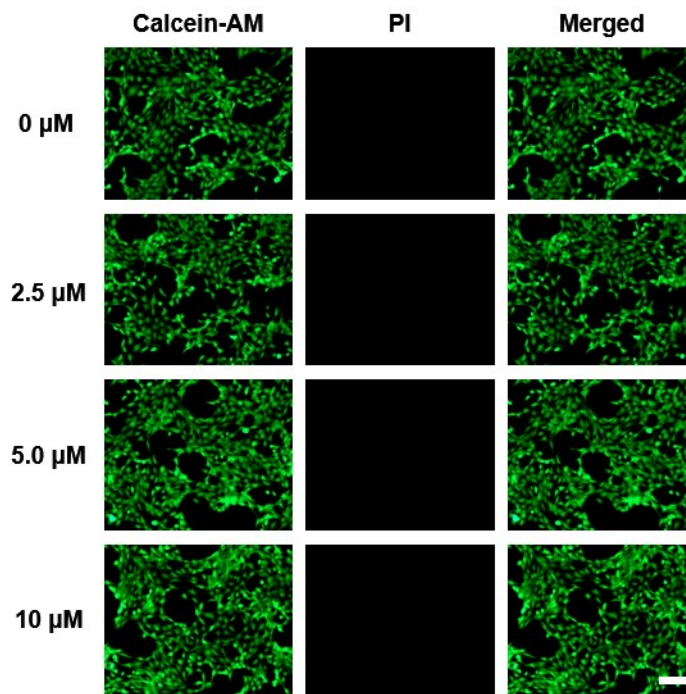

**Fig. S4** Calcein-AM/PI co-staining of 4T1 cells after incubated with different concentrations of HCy-Lyso (0-10  $\mu\text{M}$ ) for 12 h in the dark. Scale bar: 100  $\mu\text{m}$ .

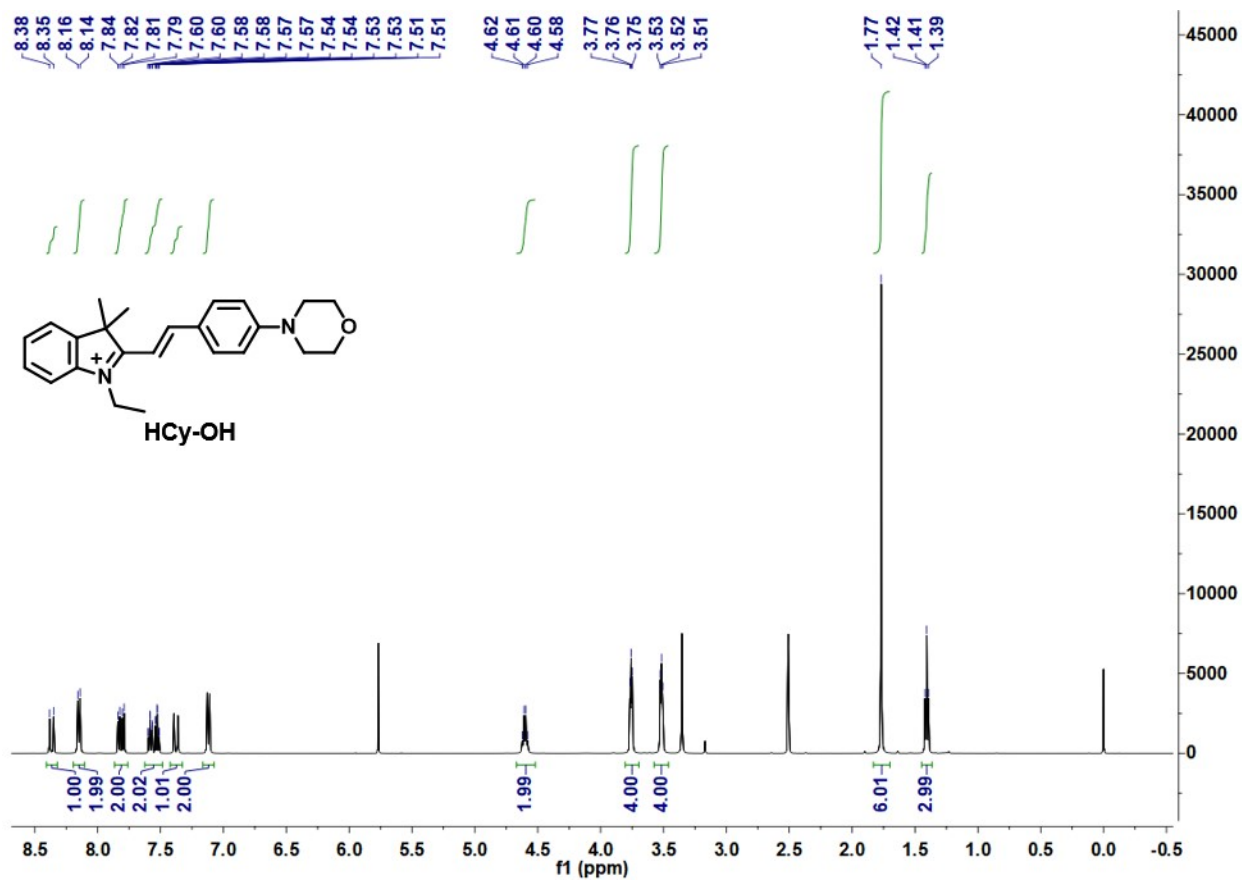

Fig. S5  $^1\text{H}$  NMR spectra of HCy-OH.

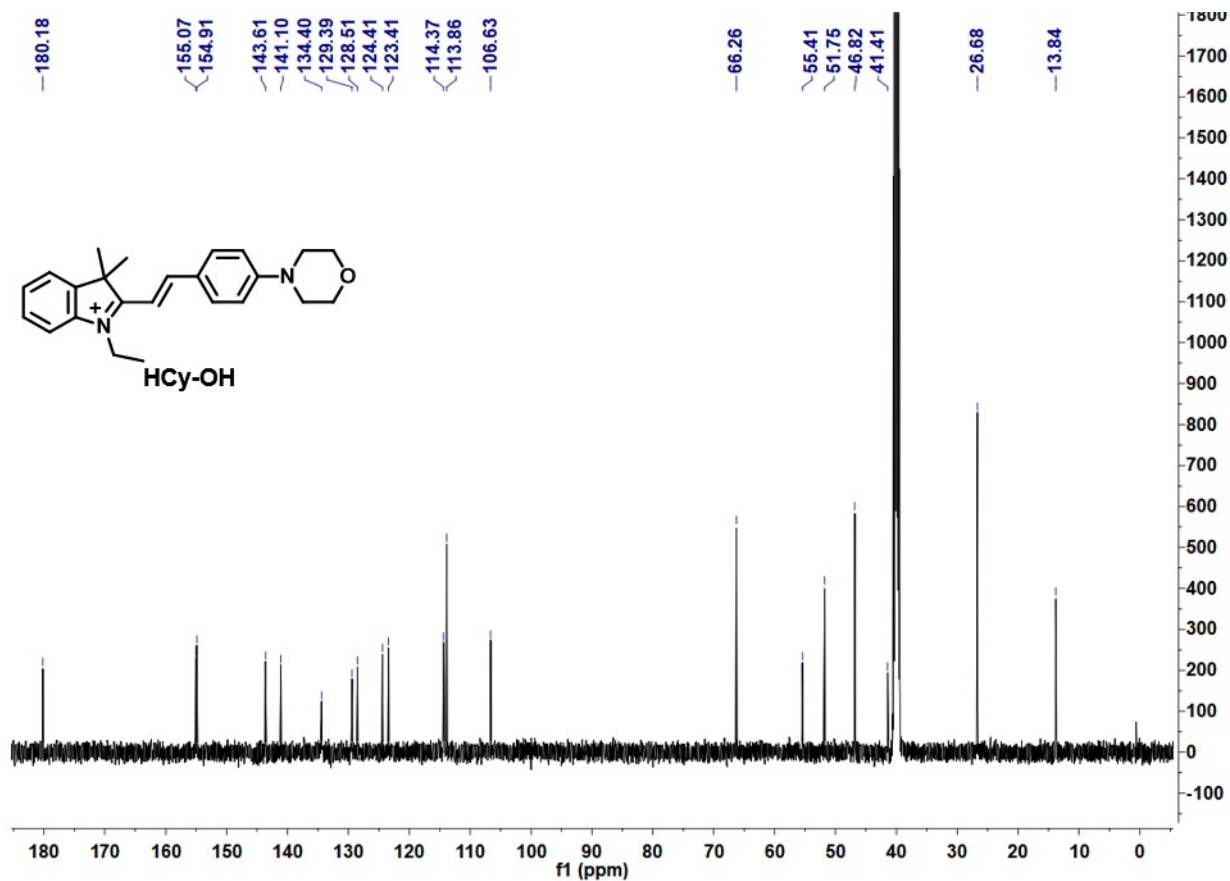

Fig. S6  $^{13}\text{C}$  NMR spectra of HCy-OH.

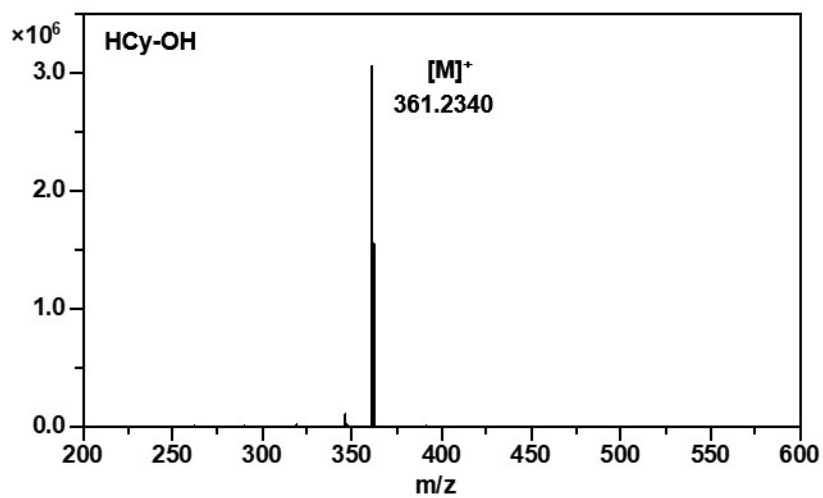

Fig. S7 HRMS spectra of HCy-OH.

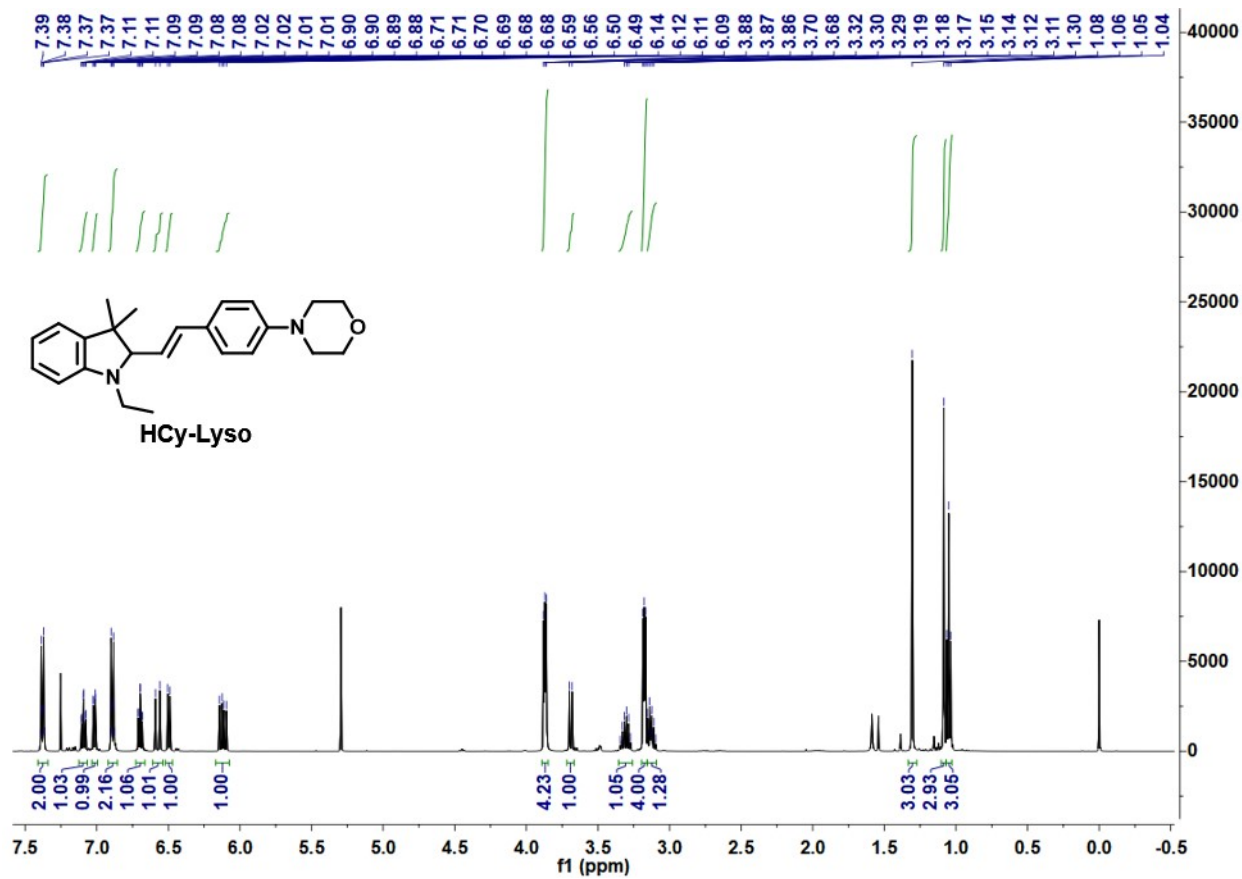

**Fig. S8**  $^1\text{H}$  NMR spectra of HCy-Lyso.

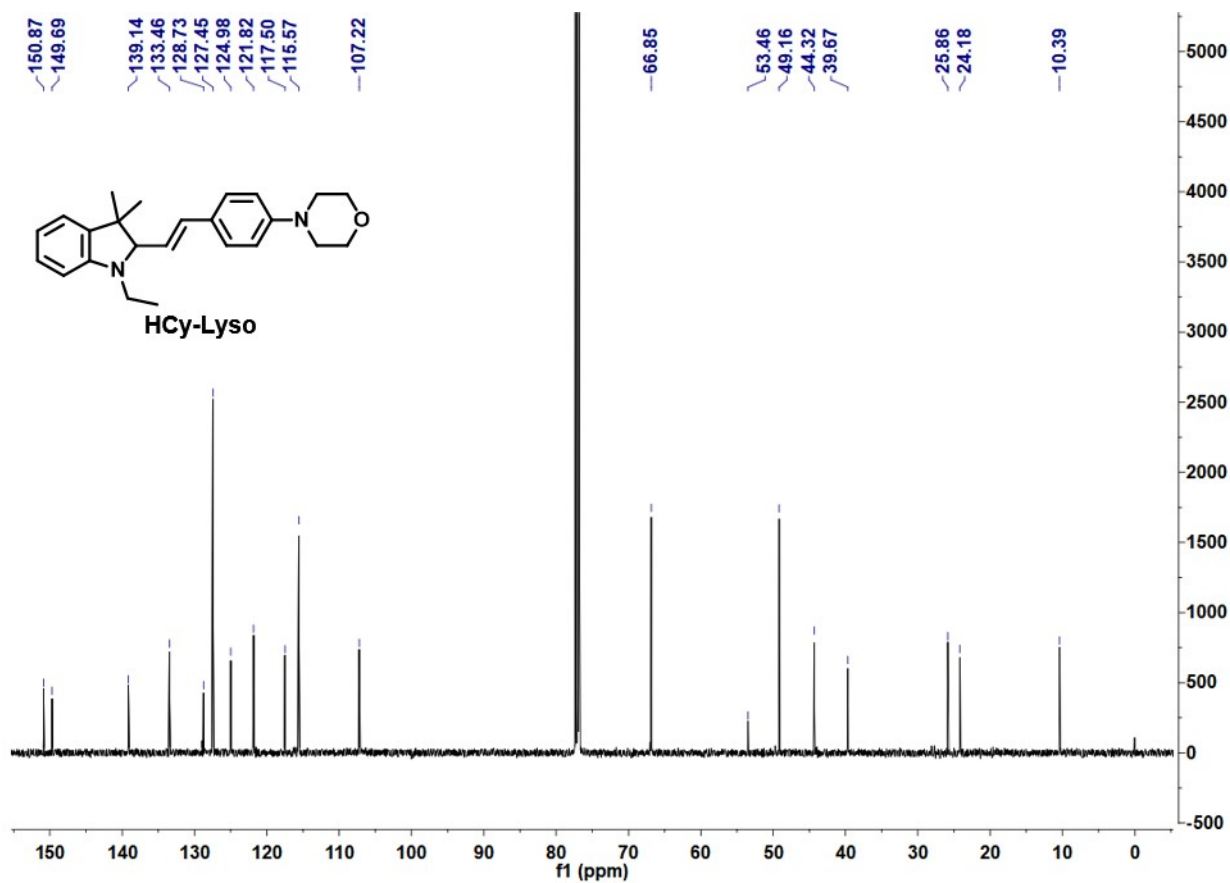

Fig. S9  $^{13}\text{C}$  NMR spectra of HCy-Lyso.

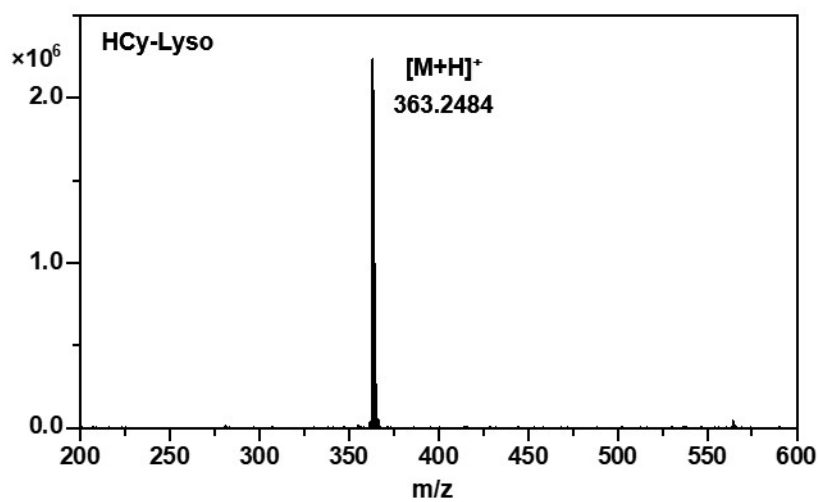

Fig. S10 HRMS spectra of HCy-Lyso.



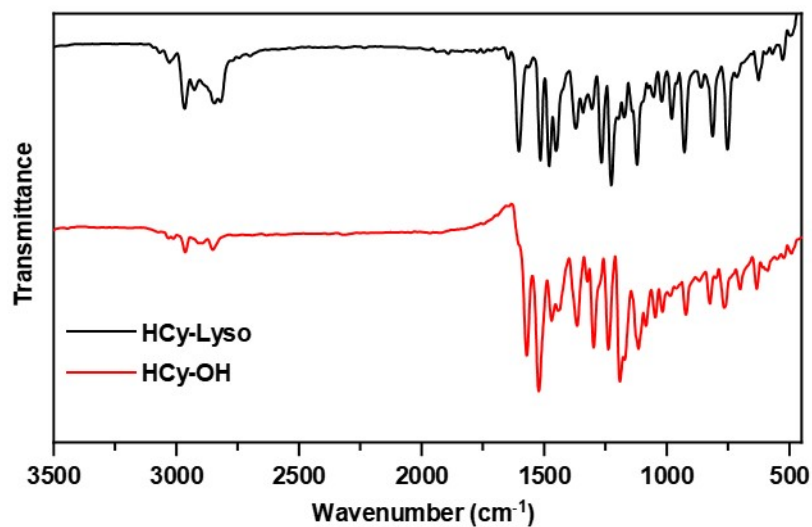

**Fig. S11** FTIR spectra of HCy-Lyso and HCy-OH.

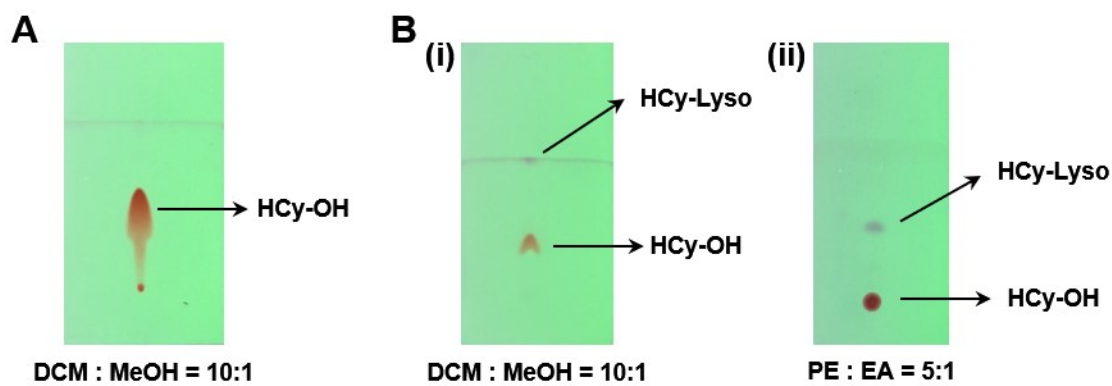

**Fig. S12** (A) Thin layer chromatography plate of HCy-OH reaction solution, run with dichloromethane and methanol as eluent. (B) Thin layer chromatography of HCy-Lyso mixture with different eluent, (i) dichloromethane and methanol; (ii) petroleum ether and ethyl acetate.
